# Supplementary material for: Phylogenetic Relationships and Next-Generation Barcodes in the Genus Torreya Reveal a High Proportion of Misidentified Cultivated Plants
Source: MDPI journal article supplement (doi:10.3390/ijms241713216), 2023-08-25
Supplement: s1 [file s1]

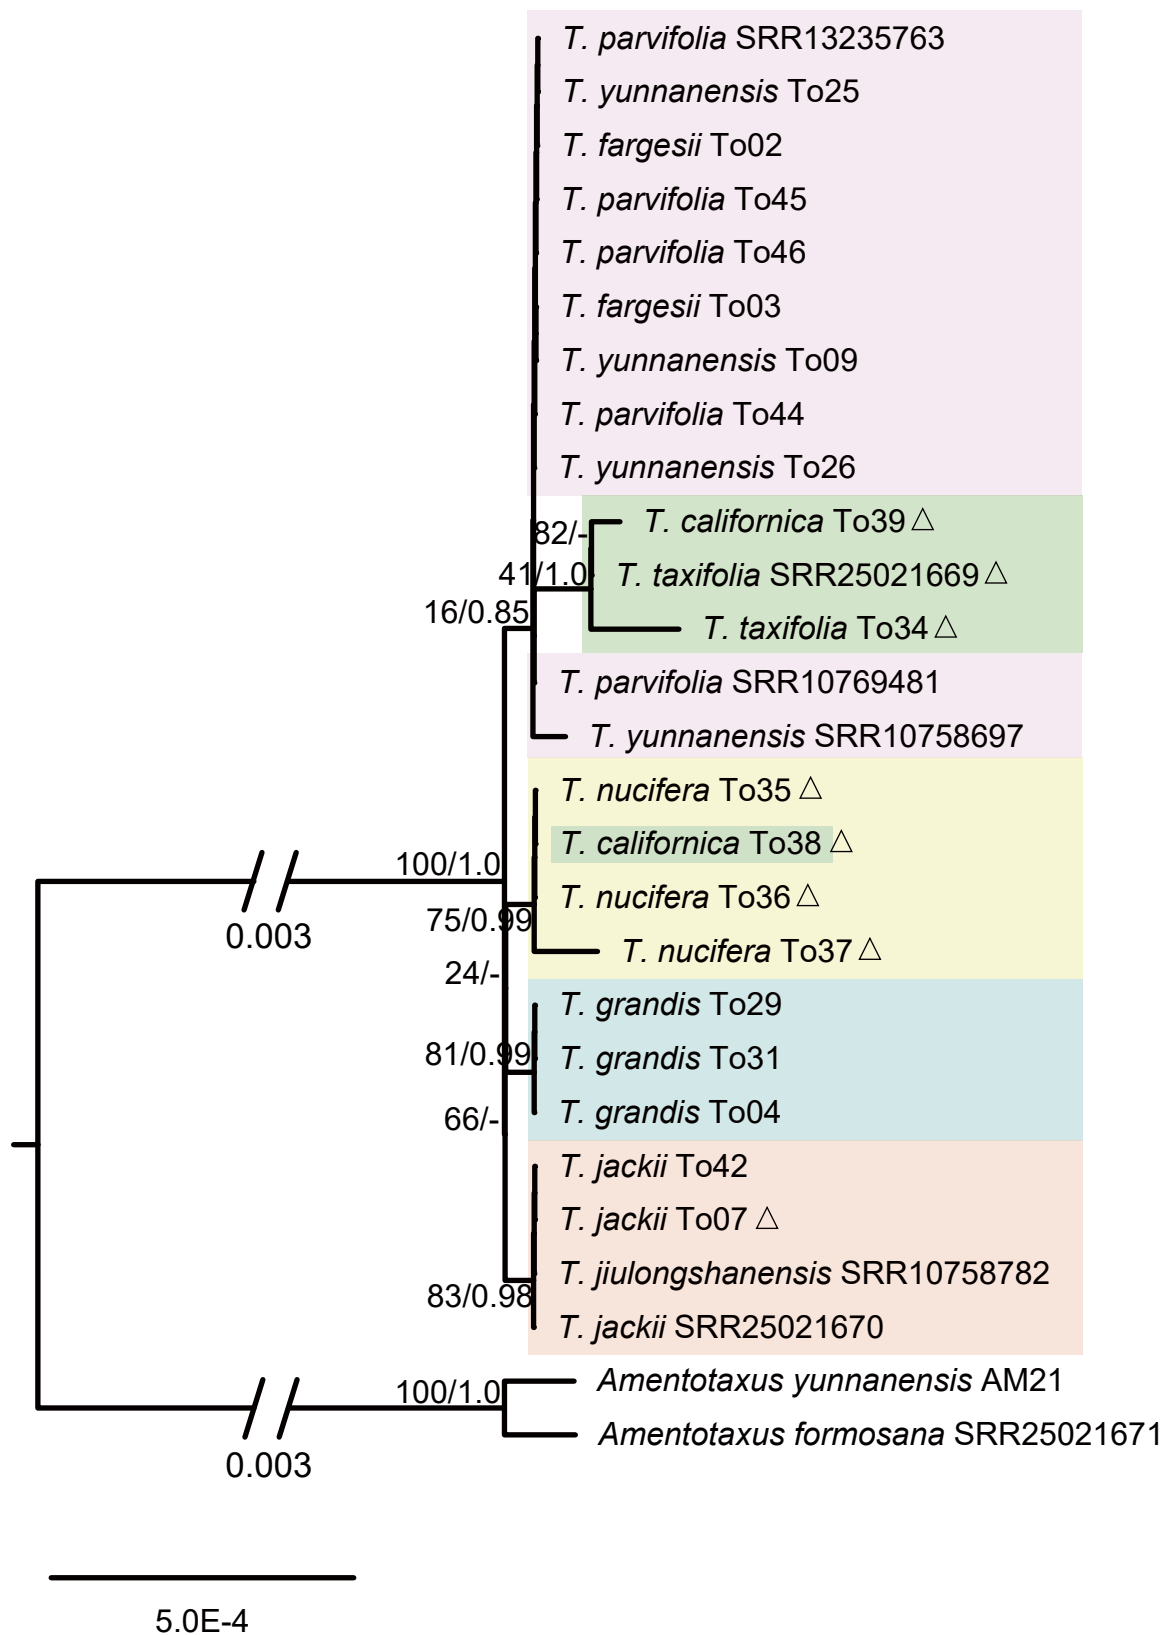

**Figure S2.** Phylogenetic relationships of *Torreya* constructed using RAxML based on the filtered mitochondrial matrix. ML tree is shown with Maximum Likelihood bootstrap (BS)/Bayesian Inference posterior probability (PP) values given for each taxon node. Cultivated samples of *Torreya* are marked with triangles.
