# Supplementary material for: Phylogenetic Relationships and Next-Generation Barcodes in the Genus Torreya Reveal a High Proportion of Misidentified Cultivated Plants
Source: MDPI journal article supplement (doi:10.3390/ijms241713216), 2023-08-25
Supplement: s1 [file s1]

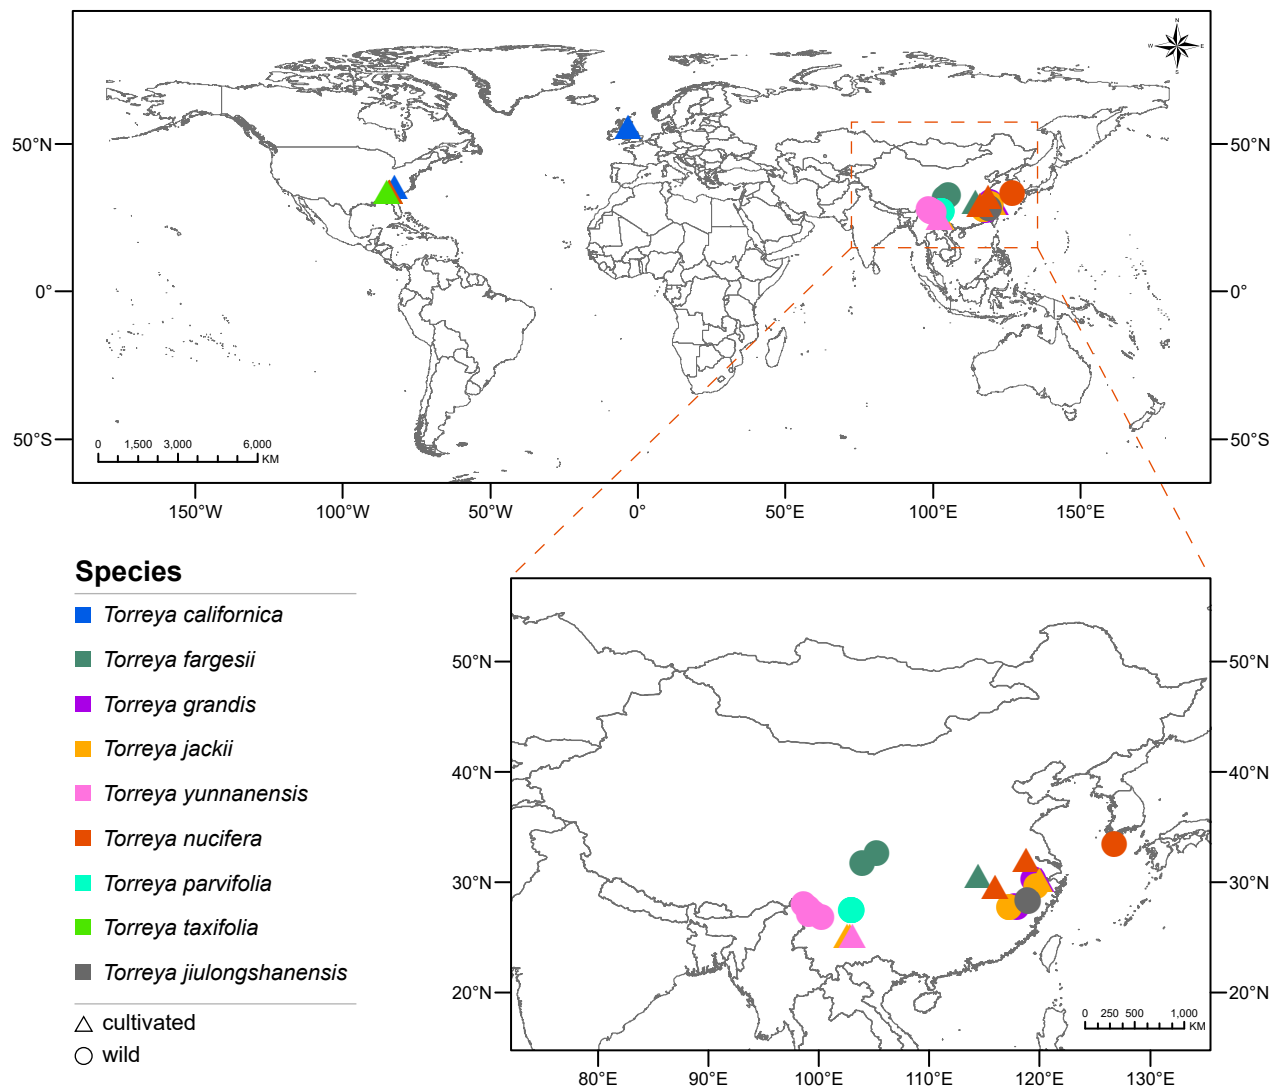

**Figure S1.** Sampling locations of *Torreya* species, each of which is designated with a different color. A triangle and a circle indicate the cultivated and wild source of each sample, respectively.
